# Supplementary material
Source: PubMed Central journal article supplement (PMC6719534)
Supplement: NIHMS1046019-supplement-Flowchart.pdf [file NIHMS1046019-supplement-Flowchart.pdf]

### Appendix. Cohort Selection Flow Chart, 2010-2012

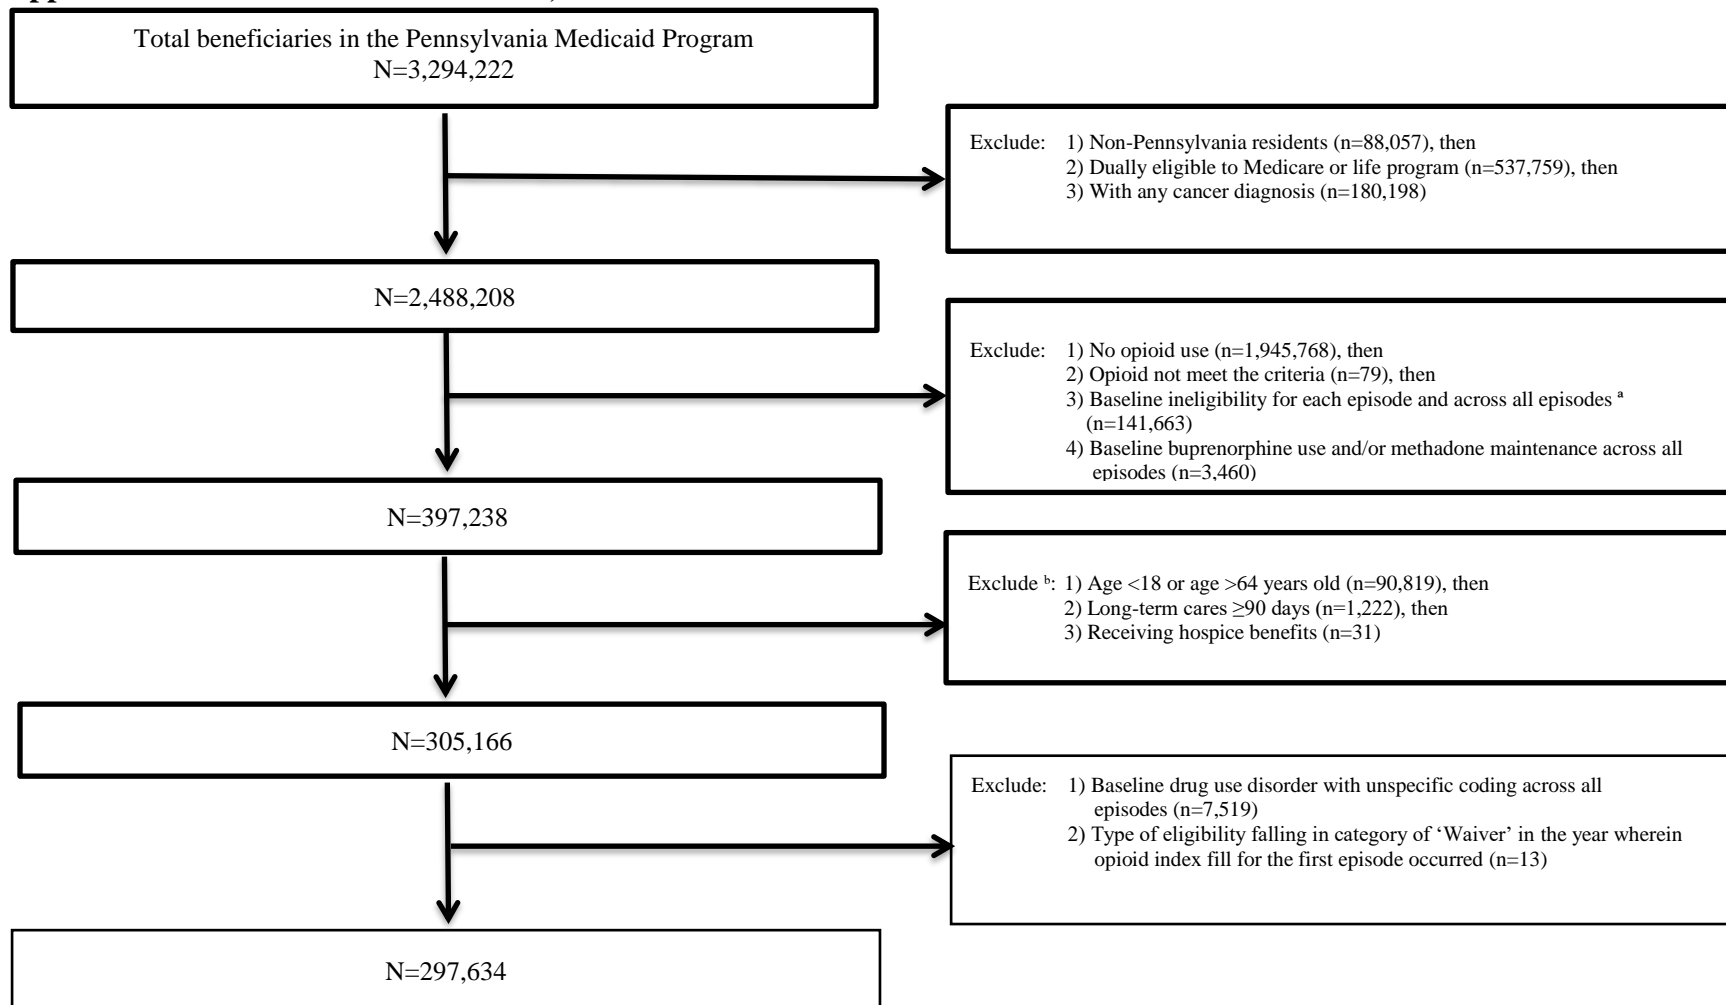

<sup>a</sup>Those meeting any of following conditions were considered ineligible: (1) enrollment < 6 months before index fill; (2) overdose < 6 months before index fill; (3) opioid use disorder < 6 months before index fill. <sup>b</sup> Exclusion applies to the year wherein opioid index fill for the first episode occurred
